# Supplementary material for: The Addition of Reishi and Lion’s Mane Mushroom Powder to Pasta Influences the Content of Bioactive Compounds and the Antioxidant, Potential Anti-Inflammatory, and Anticancer Properties of Pasta
Source: MDPI journal article supplement (doi:10.3390/antiox12030738), 2023-03-17
Supplement: s1 [file s1]

**Table S1.** Parameters of all the molecules monitored with the MRM method

| Compound                    | Precursor ion Q1 (m/z) | Product ion Q2 (m/z) | CE (V) | Retention time (min) |
|-----------------------------|------------------------|----------------------|--------|----------------------|
| Gallic acid 1               | 169                    | 124.9                | -20    | 1.89                 |
| Gallic acid 2               | 169                    | 78.9                 | -30    | 1.89                 |
| 3,4-Dihydroxybenzoic acid 1 | 153                    | 108.9                | -20    | 3                    |
| 3,4-Dihydroxybenzoic acid 2 | 153                    | 65                   | -26    | 3                    |
| Chlorogenic acid 1          | 352.9                  | 190.8                | -26    | 3.45                 |
| Chlorogenic acid 2          | 352.9                  | 84.9                 | -26    | 3.45                 |
| Caffeic acid 1              | 179                    | 135                  | -22    | 3.75                 |
| Caffeic acid 2              | 179                    | 107                  | -32    | 3.75                 |
| Syringic acid 1             | 197                    | 181.9                | -18    | 3.8                  |
| Syringic acid 2             | 197                    | 122.9                | -30    | 3.8                  |
| Daidzin 1                   | 415.1                  | 251.9                | -38    | 3.96                 |
| Daidzin 2                   | 415.1                  | 222.8                | -38    | 3.96                 |
| Rutin 1                     | 609                    | 300.3                | -46    | 4.01                 |
| Rutin 2                     | 609                    | 270.9                | -46    | 4.01                 |
| Ellagic acid 1              | 301                    | 284                  | -40    | 4.27                 |
| Ellagic acid 2              | 301                    | 229                  | -38    | 4.27                 |
| p-Coumaric acid 1           | 163                    | 119                  | -20    | 4.33                 |
| p-Coumaric acid 2           | 163                    | 92.9                 | -42    | 4.33                 |
| Salicylic acid 1            | 137                    | 93                   | -16    | 4.46                 |
| Salicylic acid 2            | 137                    | 75                   | -40    | 4.46                 |
| Vanillin 1                  | 150.9                  | 136.1                | -18    | 4.65                 |
| Vanillin 2                  | 150.9                  | 91.9                 | -26    | 4.65                 |
| Cynarin 1                   | 515                    | 353                  | -28    | 4.68                 |
| Cynarin 2                   | 515                    | 191                  | -42    | 4.68                 |

|                        |       |       |     |      |
|------------------------|-------|-------|-----|------|
| m-Coumaric acid 1      | 163   | 119   | -20 | 4.72 |
| m-Coumaric acid 2      | 163   | 92.9  | -42 | 4.72 |
| Ferulic acid 2         | 193   | 177.9 | -18 | 4.74 |
| Ferulic acid 1         | 193   | 134   | -22 | 4.74 |
| Sinapic acid 1         | 223.1 | 164   | -22 | 4.78 |
| Sinapic acid 2         | 223.1 | 148.9 | -28 | 4.78 |
| Rosmarinic acid 1      | 358.9 | 160.9 | -22 | 4.8  |
| Rosmarinic acid 2      | 358.9 | 132.6 | -40 | 4.8  |
| Naringin               | 579   | 271   | -32 | 5.03 |
| Quercetin 1            | 301   | 121   | -34 | 7.08 |
| Quercetin 2            | 301.1 | 150.9 | -30 | 7.08 |
| trans-cinnamic-d7 acid | 153.9 | 110   | -16 | 7.4  |
| trans-cinnamic acid 1  | 146.9 | 77    | -28 | 7.53 |
| trans-cinnamic acid 2  | 146.9 | 103   | -14 | 7.53 |
| Apigenin 1             | 269.9 | 116.9 | -42 | 8.33 |
| Apigenin 2             | 269.9 | 150.9 | -34 | 8.33 |
| Genistein 1            | 269   | 133   | -30 | 8.42 |
| Genistein 2            | 269   | 159   | -40 | 8.42 |
| Naringenin 1           | 271   | 150.9 | -24 | 8.51 |
| Naringenin 2           | 271   | 118.9 | -34 | 8.51 |

**Table S2.** Qualitative-quantitative analysis of phenolic compounds using the LC-MS/MS technique in ethanolic (A), PBS (B) and GID (C) extracts

| A (Ethanolic extracts)        |                           |              |                           |         |       |              |                           |                |                           |                            |                           |                 |                         |           |            |
|-------------------------------|---------------------------|--------------|---------------------------|---------|-------|--------------|---------------------------|----------------|---------------------------|----------------------------|---------------------------|-----------------|-------------------------|-----------|------------|
| Name of polyphenolic compound | [ng/g DW]                 |              |                           |         |       |              |                           |                |                           |                            |                           |                 |                         |           |            |
|                               | 3,4-Dihydroxybenzoic acid | Caffeic acid | Syringic acid             | Daidzin | Rutin | Ellagic acid | <i>p</i> -Coumaric acid   | Salicylic acid | Vanillin                  | Ferulic acid               | Sinapic acid              | Rosmarinic acid | <i>t</i> -Cinnamic acid | Genistein | Naringenin |
| C                             | 13.73±0.12 <sup>a</sup>   | <1           | 153.03±2.37 <sub>ab</sub> | n.d     | <1    | n.d          | 314.90±6.06 <sub>ab</sub> | <1             | 112.17±13.05 <sup>a</sup> | 1587.57±85.27 <sup>a</sup> | 177.77±4.56 <sup>ab</sup> | n.d             | n.d                     | n.d       | n.d        |

|                  |                           |                                    |                                       |      |    |     |                                       |    |                                     |                                        |                                       |    |     |     |     |
|------------------|---------------------------|------------------------------------|---------------------------------------|------|----|-----|---------------------------------------|----|-------------------------------------|----------------------------------------|---------------------------------------|----|-----|-----|-----|
| <b>R2.5</b>      | 186.60±7.27 <sup>ab</sup> | 19.33±0.9 <sub>2<sup>a</sup></sub> | 862.10±27.3 <sub>7<sup>ab</sup></sub> | <1   | <1 | n.d | 287.67±10.5 <sub>ab</sub>             | <1 | 105.73±7.5 <sup>a</sup>             | 1314.03±78.1 <sub>7<sup>ab</sup></sub> | 336.67±18.1 <sub>13<sup>a</sup></sub> | <1 | n.d | n.d | <1  |
| <b>R5</b>        | 316.60±0.69 <sup>b</sup>  | 35.17±16.22 <sup>a</sup>           | 1242.43±77.31 <sup>a</sup>            | <1   | <1 | n.d | 197.33±5.48 <sub>a</sub>              | <1 | 96.83±6.29 <sup>a</sup>             | 918.23±20.50 <sub>b</sub>              | 256.47±4.2 <sub>7<sup>ab</sup></sub>  | <1 | n.d | n.d | <1  |
| <b>L2.5</b>      | 22.83±0.92 <sup>ab</sup>  | <1                                 | 106.43±6.12 <sub>ab</sub>             | n.d  | <1 | n.d | 343.83±15.9 <sub>9<sup>ab</sup></sub> | <1 | 104.57±2.0 <sub>2<sup>a</sup></sub> | 1436.23±78.3 <sub>5<sup>ab</sup></sub> | 120.50±2.9 <sub>4<sup>ab</sup></sub>  | <1 | n.d | n.d | n.d |
| <b>L5</b>        | 26.37±0.64 <sup>ab</sup>  | <1                                 | 93.87±2.83 <sup>b</sup>               | n.d. | <1 | n.d | 381.83±8.08 <sub>b</sub>              | <1 | 84.70±5.89 <sup>a</sup>             | 1457.43±2.66 <sub>ab</sub>             | 115.87±1.6 <sub>2<sup>b</sup></sub>   | <1 | n.d | n.d | n.d |
| <i>P - value</i> | <i>0.0086</i>             | <i>0.0809</i>                      | <i>0.0086</i>                         | -    | -  | -   | <i>0.0086</i>                         | -  | <i>0.0651</i>                       | <i>0.0189</i>                          | <i>0.0086</i>                         | -  | -   | -   | -   |

| <b>B (PBS extracts)</b>       |                           |              |                             |         |       |              |                            |                |                           |                             |              |                 |                         |           |            |
|-------------------------------|---------------------------|--------------|-----------------------------|---------|-------|--------------|----------------------------|----------------|---------------------------|-----------------------------|--------------|-----------------|-------------------------|-----------|------------|
| Name of polyphenolic compound | [ng/g DW]                 |              |                             |         |       |              |                            |                |                           |                             |              |                 |                         |           |            |
|                               | 3,4-Dihydroxybenzoic acid | Caffeic acid | Syringic acid               | Daidzin | Rutin | Ellagic acid | <i>p</i> -Coumaric acid    | Salicylic acid | Vanillin                  | Ferulic acid                | Sinapic acid | Rosmarinic acid | <i>t</i> -Cinnamic acid | Genistein | Naringenin |
| <b>C</b>                      | 26.33±5.08 <sup>a</sup>   | n.d          | 140.13±16.86 <sup>ab</sup>  | n.d     | <1    | n.d          | 209.10±16.45 <sup>a</sup>  | <1             | 69.90±11.78 <sup>ab</sup> | 1247.77±150.46 <sup>a</sup> | 48.57±10.33  | n.d             | n.d                     | n.d       | n.d        |
| <b>R2.5</b>                   | 15.70±3.64 <sup>a</sup>   | n.d          | 727.67±24.31 <sup>ab</sup>  | <1      | n.d   | n.d          | 187.70±1.04 <sup>a</sup>   | <1             | 70.73±4.62 <sup>ab</sup>  | 809.20±31.00 <sup>a</sup>   | n.d          | n.d             | n.d                     | <1        | <1         |
| <b>R5</b>                     | 30.27±8.54 <sup>a</sup>   | n.d          | 2400.87±900.20 <sup>a</sup> | <1      | n.d   | n.d          | 261.80±103.75 <sup>a</sup> | <1             | 134.83±47.57 <sup>a</sup> | 1406.67±595.71 <sup>a</sup> | n.d          | n.d             | n.d                     | <1        | <1         |
| <b>L2.5</b>                   | n.d                       | n.d          | 101.50±6.06 <sup>ab</sup>   | n.d     | n.d   | n.d          | 251.80±2.42 <sup>a</sup>   | <1             | 65.83±5.31 <sup>ab</sup>  | 1004.83±1.33 <sup>a</sup>   | n.d          | n.d             | n.d                     | n.d       | n.d        |
| <b>L5</b>                     | n.d                       | n.d          | 97.90±0.17 <sub>b</sub>     | n.d.    | n.d   | n.d          | 277.73±2.54 <sup>a</sup>   | <1             | 57.33±5.77 <sup>b</sup>   | 1159.57±15.13 <sup>a</sup>  | n.d          | n.d             | n.d                     | n.d       | n.d        |
| <i>P - value</i>              | <i>0.5660</i>             | --           | <i>0.0097</i>               | -       | -     | -            | <i>0.1088</i>              | -              | <i>0.0349</i>             | <i>0.1416</i>               | -            | -               | -                       | -         | -          |

| <b>C (GID samples)</b>        |                           |              |                                        |         |       |              |                           |                |                           |                           |                          |                 |                         |           |            |
|-------------------------------|---------------------------|--------------|----------------------------------------|---------|-------|--------------|---------------------------|----------------|---------------------------|---------------------------|--------------------------|-----------------|-------------------------|-----------|------------|
| Name of polyphenolic compound | [ng/g DW]                 |              |                                        |         |       |              |                           |                |                           |                           |                          |                 |                         |           |            |
|                               | 3,4-Dihydroxybenzoic acid | Caffeic acid | Syringic acid                          | Daidzin | Rutin | Ellagic acid | <i>p</i> -Coumaric acid   | Salicylic acid | Vanillin                  | Ferulic acid              | Sinapic acid             | Rosmarinic acid | <i>t</i> -Cinnamic acid | Genistein | Naringenin |
| <b>C</b>                      | n.d                       | n.d          | 124.85±0.52 <sup>b</sup>               | n.d     | <1    | n.d          | 143.08±2.19 <sup>a</sup>  | <1             | 179.85±7.09 <sup>a</sup>  | 936.87±43.13 <sup>a</sup> | 68.28±0.09 <sup>b</sup>  | <1              | n.d                     | <1        | n.d        |
| <b>R2.5</b>                   | 32.27±0.79 <sup>a</sup>   | n.d          | 502.22±49.95 <sup>a</sup> <sub>b</sub> | n.d     | <1    | n.d          | 159.70±12.07 <sup>a</sup> | <1             | 202.83±16.88 <sup>a</sup> | 906.57±73.13 <sup>a</sup> | 136.01±8.49 <sup>a</sup> | n.d             | n.d                     | <1        | <1         |

|                  |                              |     |                                |     |     |     |                               |    |                               |                            |                               |     |     |    |     |
|------------------|------------------------------|-----|--------------------------------|-----|-----|-----|-------------------------------|----|-------------------------------|----------------------------|-------------------------------|-----|-----|----|-----|
| <b>R5</b>        | 26.62±03.8<br>5 <sup>a</sup> | n.d | 799.85±32.05 <sup>a</sup>      | n.d | <1  | n.d | 131.31±2<br>.45 <sup>a</sup>  | <1 | 188.94±0.<br>52 <sup>a</sup>  | 760.00±30.70 <sup>a</sup>  | 135.71±3<br>.50 <sup>ab</sup> | n.d | n.d | <1 | <1  |
| <b>L2.5</b>      | n.d                          | n.d | 109.19±16.62 <sup>a</sup><br>b | n.d | n.d | n.d | 153.89±2<br>0.56 <sup>a</sup> | <1 | 223.28±4<br>3.65 <sup>a</sup> | 863.94±121.77 <sup>a</sup> | 23.23±5.<br>16 <sup>b</sup>   | n.d | n.d | <1 | n.d |
| <b>L5</b>        | n.d                          | n.d | 100.30±0.52 <sup>b</sup>       | n.d | n.d | n.d | 159.75±9<br>.62 <sup>a</sup>  | <1 | 207.47±3<br>6.39 <sup>a</sup> | 845.40±42.60 <sup>a</sup>  | 31.16±4.<br>29 <sup>ab</sup>  | n.d | n.d | <1 | n.d |
| <i>P - value</i> | <i>0.0809</i>                | -   | <i>0.0112</i>                  | -   | -   | -   | <i>0.0746</i>                 | -  | <i>0.5257</i>                 | <i>0.1309</i>              | <i>0.0122</i>                 | -   | -   | -  | -   |
